# Supplementary figures and images for: ER membrane contact sites support endosomal small GTPase conversion for exosome secretion
Source: PubMed Central journal article supplement — J Cell Biol. 2022 Sep 22;221(12):e202112032. doi: 10.1083/jcb.202112032 (PMC9507465; doi:10.1083/jcb.202112032), 2022-09-22

# SourceDataF4

## F

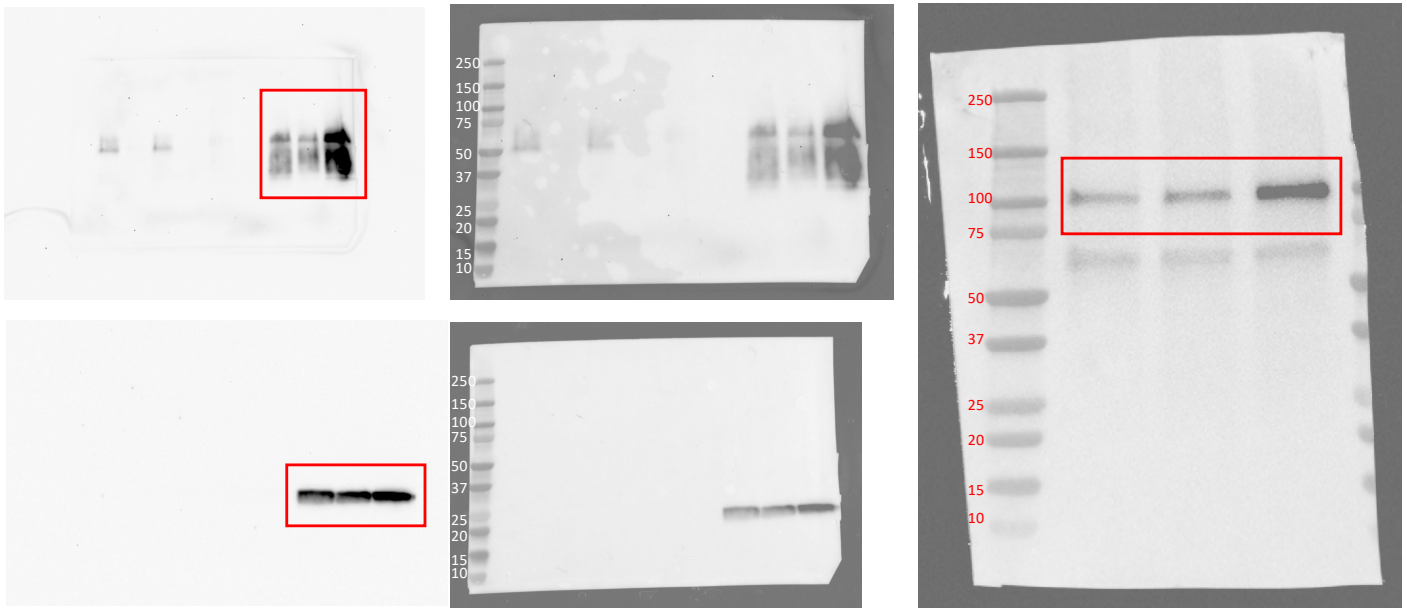

## G

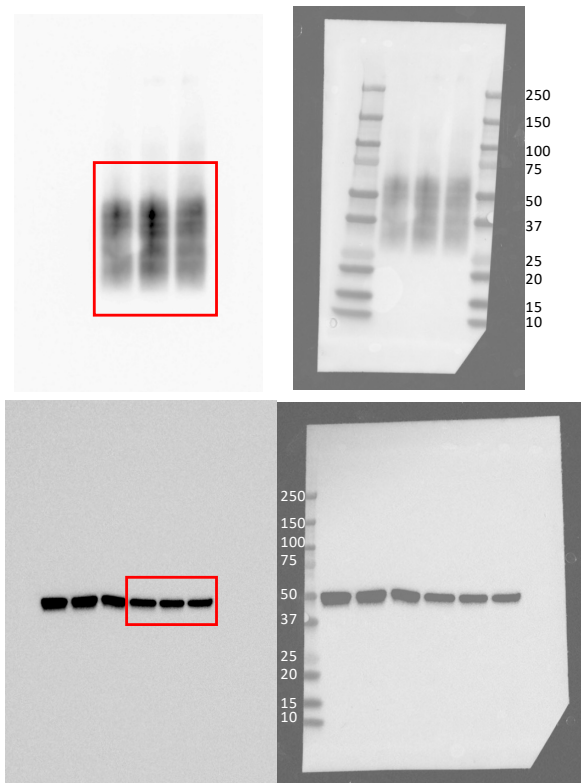

Supplement: JCB_202112032_SourceDataF4.pdf [file JCB_202112032_SourceDataF4.pdf]

# SourceDataFS3

A

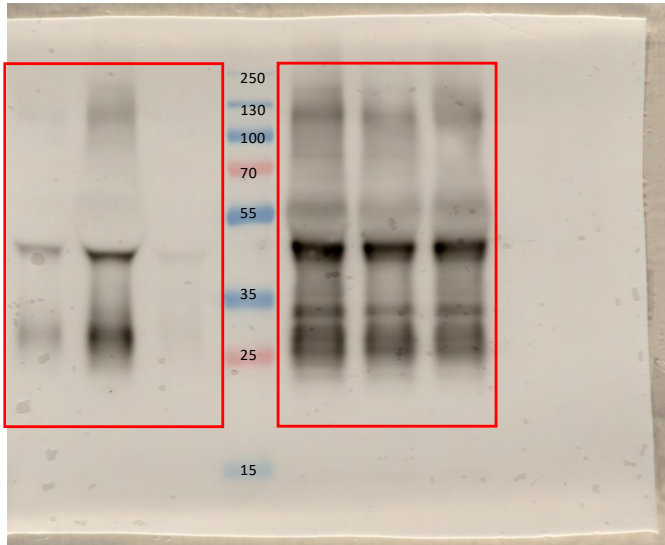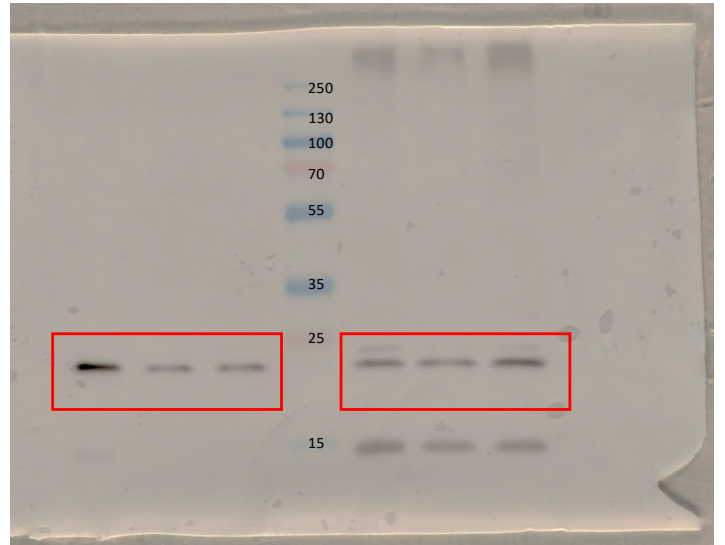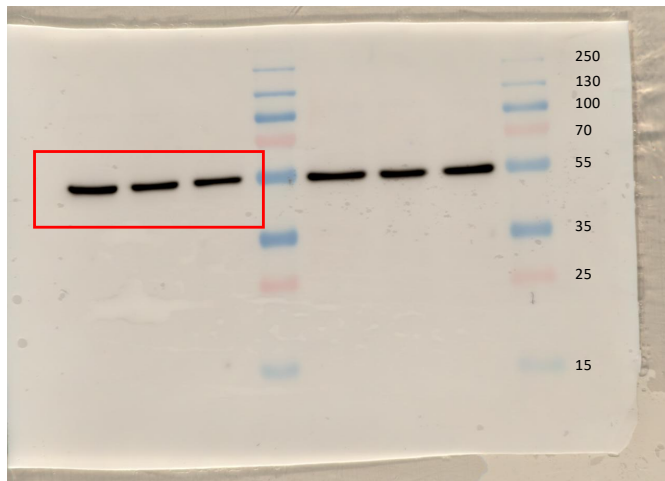

C

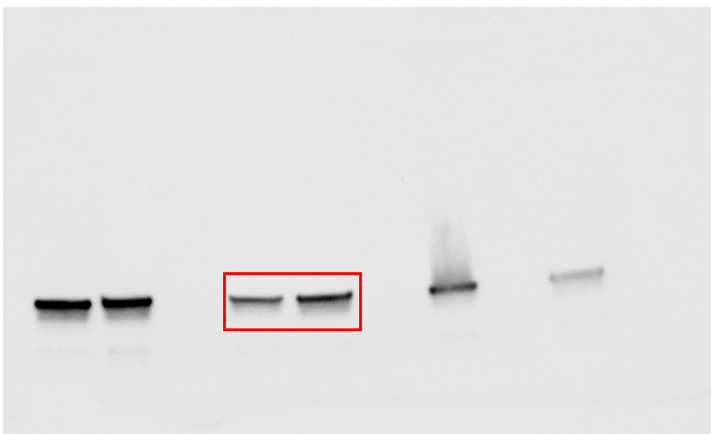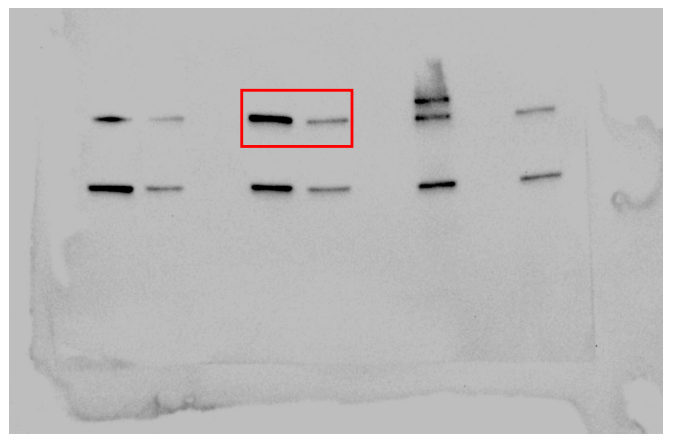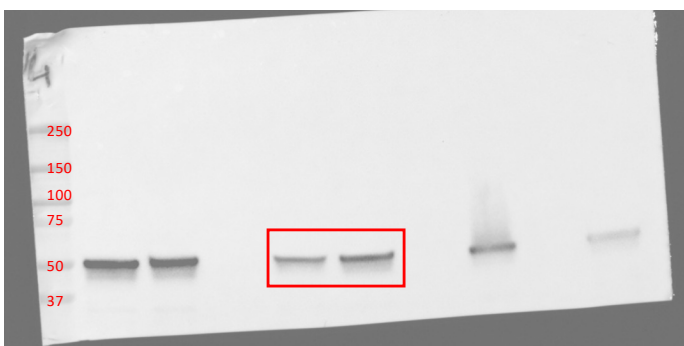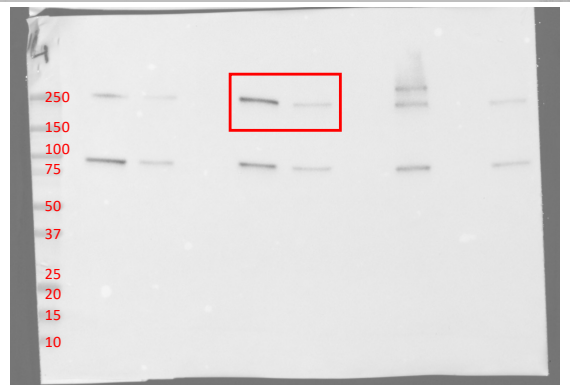

Supplement: JCB_202112032_SourceDataFS3.pdf [file JCB_202112032_SourceDataFS3.pdf]
